# Supplementary material
Source: Springer Nature journal article supplement (https://www.springerprofessional.de/resource/supplementary/13638_2011_191_MOESM8_ESM.pdf/11897134)

Latency (ms)

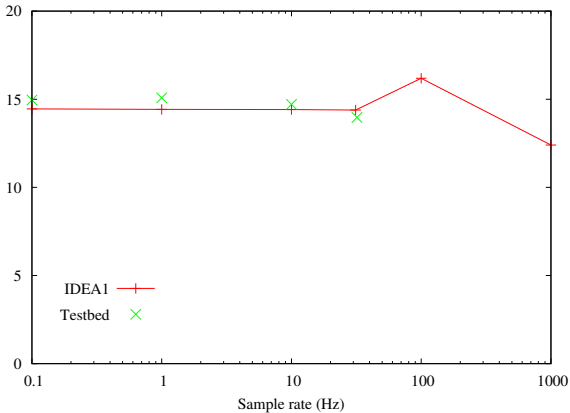

Supplement: MOESM8 [file 11897134]
